# Supplementary material for: Characterization of genes encoding small heat shock proteins from Bemisia tabaci and expression under thermal stress
Source: PeerJ journal article supplement (doi:10.7717/peerj.6992), 2019-06-05
Supplement: Supplementary_Figure.pdf [file Supplementary_Figure.pdf]

**FIGURE S1.** Nucleotide and deduced amino acid sequences of genes encoding small heat shock proteins (sHSPs) in *Bemisia tabaci*. The three sHSP genes include *Bthsp19.5* (A); *Bthsp19.2* (B); and *Bthsp21.3* (C). HSP20 family profiles and  $\alpha$ -crystallin domains are underscored.

```

1      ATCAACGCAGAGTACATGGGATTCAATAGAAATGGCTTTGCTACCGTACTTGTTGGAAGA
1      M A L L P Y L L E E
61     GCTGAACCGACCAACCATCTACGATCAGAACTTTGGTCTAGGATTGTTCAATGATGATTT
11     L N R P T I Y D Q N F G L G L F N D D F
121    CCCGTCTGCTGTTGGATCTCTGCGCCCTTACTACCTGAGACCATGGAGACTGTTTCCCA
31     P S A V G S L R P Y Y L R P W R L F P H
181    CGATGAAAGTGGCATTCTTTCAGTACAGCATGACAAAGATGGATTTAAGGTGAATTTAGA
51     D E S G I S S V Q H D K D G F K V N L D
241    CGTACAGCAATTCAGCCAGAGGAGGTCAACGTGAAAATAGCTGACAACATATGTCATCGT
71     V Q Q F K P E E V N V K I A D N Y V I V
301    CAACGCTAAACATGAGGAGCGTAGTGATGAACATGGCTTCATTTACGAGAATTCACCGG
91     N A K H E E R S D E H G F I S R E F T R
361    CCGTTACCTTCTGCCAAAAGACGTAACGCTGAGGCCCTTGACTTCATCTCTCTCTTCCGA
111    R Y L L P K D V N A E A L T S S L S S D
421    CGGAGTTCTTTCCATCCAGGCTCCACCAAAGGCAATCACCAACGATAAGGGAAATGAGGG
131    G V L S I Q A P P K A I T N D K G N E R
481    TCAAATTCAGTCACCAAAACCAAGGCCCCAGCAATCAAACAACAACAACAACAGAA
151    Q I P V T K T N A P A I K Q Q Q Q Q Q K
541    GAAGTAAATTATCGTGAATGACATTTACTCTCATCTTAAGTATTTATTTTTACGTCATCT
171    K *
601    TTCTAAGGTGAATATCTCTTACATTTTTAATGTTACTATGTAACCGACTATGTTATTACT
661    CTTTATGATAATCTAATTTTAAGTTCCTATCCATGAATAGTTTTTAATTTAGTCCCATTT
721    CAAATTTTGTCTGACTGTACATGTGTCCATTCATTAATCTTCAAATATTAAGTTACAAA
781    TTTTCATCTTTCATACTTATTAAGGAGAAAATGTTTTCAACCGTATGCAGAGCTAGACCA
841    TTCATTGTCACATTTTACTGAATTTGACATCTTCTCAGGGATATATAGGATTCAAATTTT
901    CATCTAGTTTAGTCTAGCTGTGCTCTCTGAGAAATATGAATATTAAGTGAAATTAAGTAC
961    AATTTTCTTCTGTTATTCTTTTTGAACTCTCAACTGGATCAGTAAAATGTCATTCAA
1021   TACTCAAATAATTACTTAATGCTGTTGAATTATTCTGTTCAACTGTTAAAGTCATCAGAC
1081   TTCACCCTAGTTAGTGATTAAGATTGTTTGTATAAATTATATTGTAAGGAAGATTTATT
1141   ACTTTTTAATAAAGGTGTCCAAAAAAAAAAAAAAAAAAAAAAAAAAAAAAAAAAAAA

```

**A**

1 AGCGGTTTCGATAAAATCCACTGTGTATGTCTCTCTTGCCCTACTTGTTGGAAGAATTGAAC  
1 M S L L P Y L L E E L N  
61 CGTCCAACAGTGTATGACCAAACTTCGGTGTGGACTGTGGAATGATGATCTGCCATCT  
13 R P T V Y D Q N F G V G L W N D D L P S  
121 ATCACTGCCATTGCGCCGTTTTATATGCGGCCATGGAGACTGCTTCCCCAAAATGAGAGT  
33 I T A I R P F Y M R P W R L L P Q N E S  
181 GGGACTTCATCAGTACAGCAGGATAAAGATGGATTTAAGGTGAACTTAGATGTGCAGCAG  
53 G T S S V Q H D K D G F K V N L D V Q Q  
241 TTCAAACCTGAAGAAGTGAATGTCAAAGTCAGTGACAATTATGTTACCATCCACGCCAAA  
73 F K P E E V N V K V S D N Y V T I H A K  
301 CACGAAGAACGCAGTGATGAGCATGGTTTTATTTCTCGGGAATTCAGTAGCGTTATCTC  
93 H E E R S D E H G F I S R E F T R R Y L  
361 ATCCCTAAAGACGTC AATGCGGAAGCCTTGACTTCAAGTCTTTCATCTGATGGTGTCTC  
113 I P K D V N A E A L T S S L S S D G V L  
421 TCTGTACATGCTCCGCCAAAGGCTATCACCAATGAGAATGGCAGTGAGCGCCAAATTCCA  
133 S V H A P P K A I T N E N G S E R Q I P  
481 ATTACTAAAACCAATGCTCCCGCAATCAAACAGGAACAAGCGAAGAAGAAGTAATCAATC  
153 I T K T N A P A I K Q E Q A K K K \*  
541 CTACCTTGATGTCTAATTGAGTTTTCTCTTTCTCCTCAATGAGCTTCTCCTTTTTCTC  
601 TGTACTGTAAATATTTTCACTTACTTATTTTTGTTTCTATCATTGAGAACCAGCTGTAT  
661 CAAGAAATGTTAAACAGTGAAAGTGAAACATAAATCCCTTTTAAATACTATTATGCCCC  
721 GTCAATAATTGACTATCGTTTTACGGAGCAATAGTAAAATTCCTAAAAAACCATGTA  
781 TTTTTCATAACAGGATATCATCGTAAGTGTGTGTAAGCAGAGTGCTACAGTTAGCACGT  
841 GTTCTCTTTTACCACCACCAAGAAATTACCACCGTGTGTGTAAGTACTTATTTAACTTTAG  
901 AACTATTTTTAAGTCTGCTCCATTGTTACATTATACAAAGTAGTGATAAGAAATCACTT  
961 GGAAGGTATTTTGTCTAGGTTATTGTCAACATGAAATGAATTACTGTACTGTTCTGTG  
1021 AGACTGCTACTATTTATGTAATTTTATTATTTTTTAAATAAAATTTCCAGACAAAAAA  
1081 AAAAAAAAAAAAAAAAAAAAAAAAAAAAAA

## B

1 AGCGGTTTCGATAAATCCACTGTGATATCTTCTGAGTTCGATACGTAGGTTGCGCAACCT  
61 CGAGAGGGTATAACCAGCTGGACGTCCGCCGGCGCTTAAGTGATGTCTCTCTTGCCCTAC  
1 M S L L P Y  
121 TTGTTGGAAGAATTGAACCGTCCAACAGTGTATGACCAAAACTTCGGTGTGGACTGTGG  
7 L L E E L N R P T V Y D Q N F G V G L W  
181 AATGATGATCTGCCATCTATCACTGCCATTGCCCCGTTTATATGCGGCCATGGAGACTG  
27 N D D L P S I T A I R P F Y M R P W R L  
241 CTCCCCAAAATGAGAGTGGGACTTCATCAGTACAGCACGATAAAGATGGATTTAAGGTG  
47 L P Q N E S G T S S V Q H D K D G F K V  
301 AACTTAGATGTGCAGCAGTCAAACCTGAAGAAGTGAATGTCAAAGTCAGTGACAATTAT  
67 N L D V Q Q F K P E E V N V K V S D N Y  
361 GTTACCATCCACGCCAAACACGAAGAACGCAGTGTGAGCATGGTTTTATTCTCGGGAA  
87 V T I H A K H E E R S D E H G F I S R E  
421 TTCCTAGGCGTTATCTCATCCCTAAAGACGTCAATGCGGAAGCCTTGACTTCAAGTCTT  
107 F T R R Y L I P K D V N A E A L T S S L  
481 TCATCTGATGGTGTCTCTGTACATGCTCCGCCAAAGGCTATACCAATGAGAATGGC  
127 S S D G V L S V H A P P K A I T N E N G  
541 AGTGAGCGCCAAATTCCAATTACTAAAACCAATGCTCCCGCAATCAAAACAGGAACAAGCG  
147 S E R Q I P I T K T N A P A I K Q E Q A  
601 AAGAGAGCAGAAAACGCCAACCAACGATGCCGTACCGCTAACACAAGCCCGACAGCG  
167 K R A E T P T P T M P S P L T T S P T A  
661 AAGAAAGATTGAACGAATTCGTCCGCAAATCCTACGCCGAATCAACAGTGCCTTCGTCA  
187 K K D \*  
721 ACGCCTTCGACTTCTCTGCCCAATTCCTTGACAAAAGGAAGCCGACTACGTTTGACCT  
781 TTGCCTTCGCCCGCAGCCAGTTGCTGAGAAATCTCGTTTCCTCTTCTACGGACTACTACA  
841 AACTGCCAACAACAAGAAACAACAGTGCCTTTCCACGCCTCCGCTGAGATGCCCAATG  
901 TTCCCTTGACCAACCCTGCTGCCGCATGAAGGCTGAGCCAGCTTCCAAGATCTACGCTA  
961 ACTTCAAGTTCGGAGAATCTTTCGAAAATGCCGCAAGGTTCACTTCAACGCTAACTTGA  
1021 AGCAGAGCTCTGAACGCCGTCAATTCCTCCGCAACAACGCCCTCTACAAGCAATGCGAAT  
1081 CCGAAATGGAACGTGGACAATACTTCCCTCCCTGCTTGCCGTAACCTCACCGTTGCTGACA  
1141 ACAGAAATGAACGAATACTACTACAACCTCAACTTCCAAAAAAAAAAAAAAAAAAAAAAAAA  
1201 AAAAAAAAAA

## C
